# Supplementary material for: Reclamation of hexavalent chromium using catalytic activity of highly recyclable biogenic Pd(0) nanoparticles
Source: PubMed Central journal article supplement (PMC6970990; doi:10.1038/s41598-020-57548-z), 2020-01-20
Supplement: 41598_2020_57548_MOESM1_ESM.pdf [file 41598_2020_57548_MOESM1_ESM.pdf]

# Reclamation of hexavalent chromium using catalytic activity of highly recyclable biogenic Pd(0) nanoparticles

R.M. Tripathi<sup>1,2</sup> and Sang J. Chung<sup>1\*</sup>

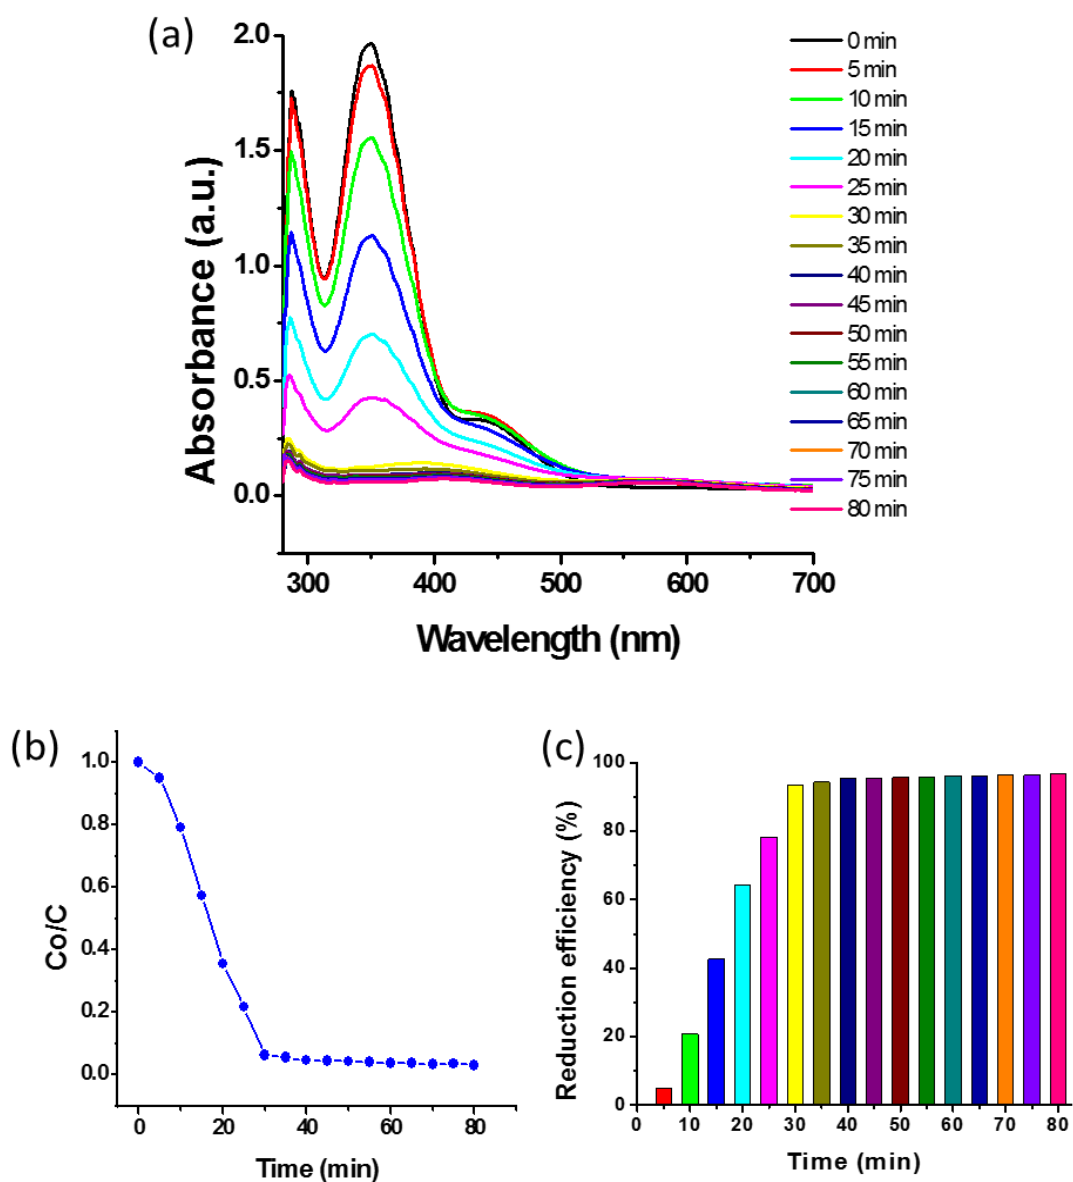

**Figure S1.** Analysis of the catalytic activity of PdNPs: (a) Absorbance spectra changes at 350 nm for Cr (VI) in the presence of PdNPs over time; (b) Reduction kinetics of Cr (VI) represented by  $C/C_0$ ; (c) Reduction efficiency (%) versus time

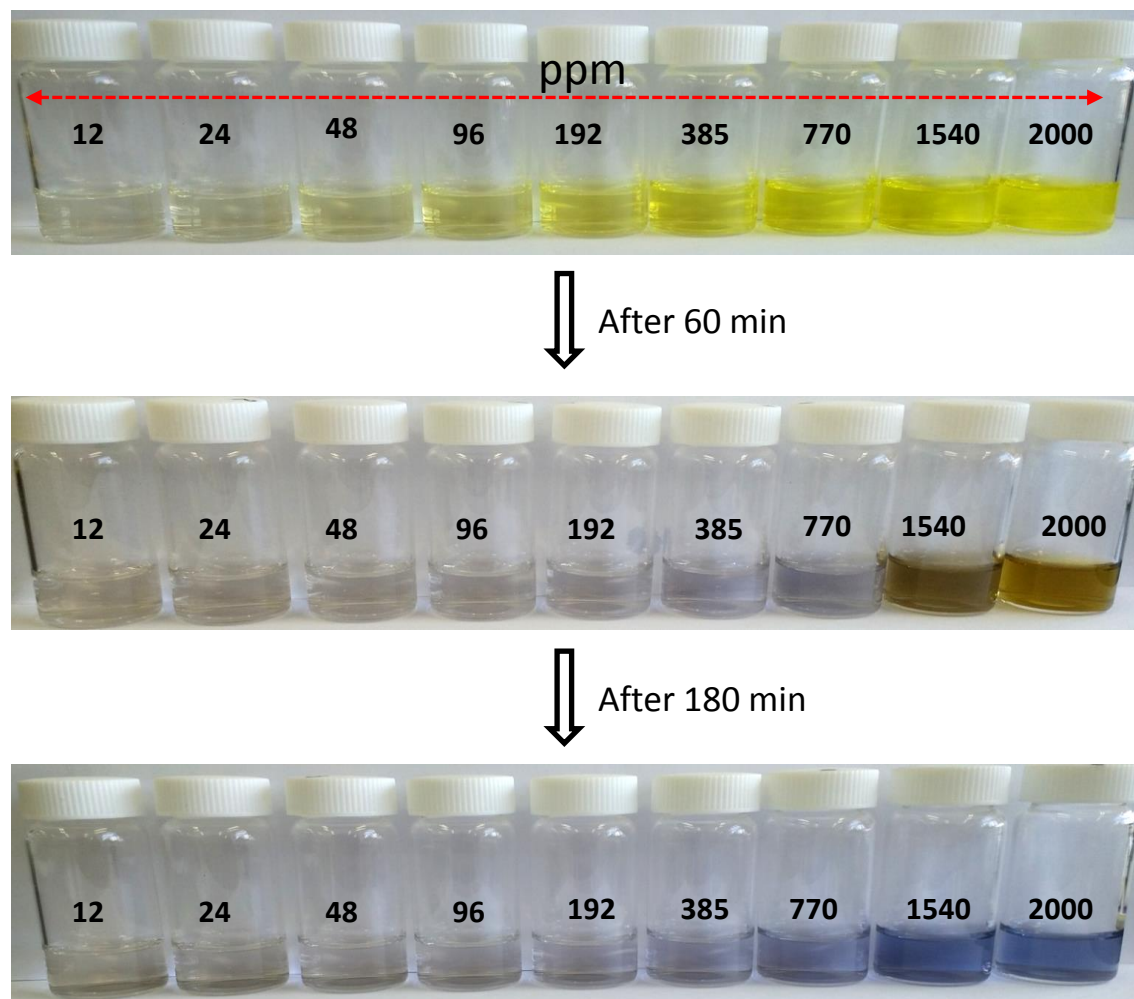

**Figure S2.** Visible colour changes of various concentrations of Cr (VI) due to the catalytic reduction into Cr (III) using PdNPs (0.043 ppm) in the presence of 0.26 M formic acid

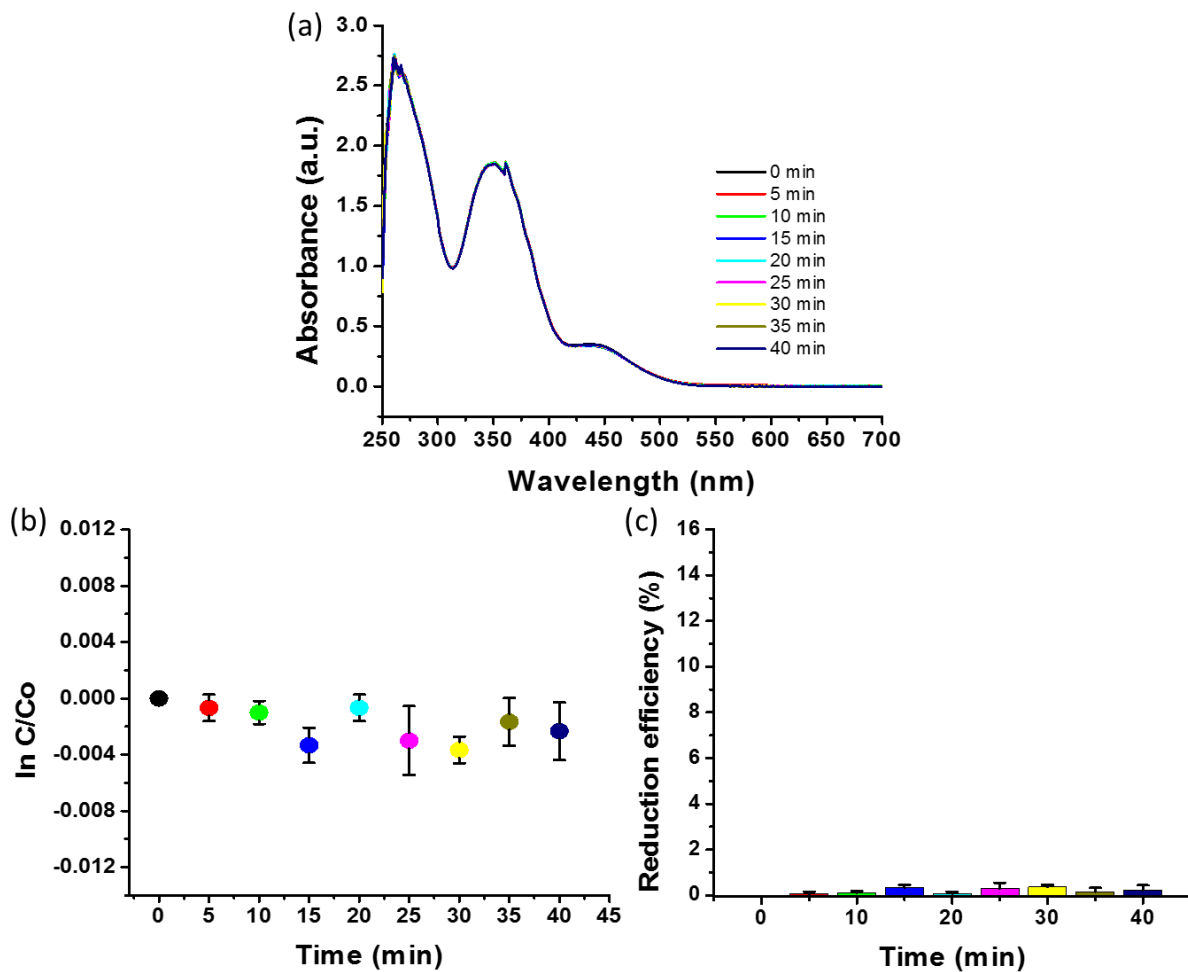

**Figure S3.** Role of leaf extract in the Cr (VI) reduction after 40 min of incubation: (a) Absorbance spectra for Cr (VI) in the presence of leaf extract as a function of time; (b) Plot of  $\ln(C/C_0)$  versus time; (c) Reduction efficiency (%) versus time

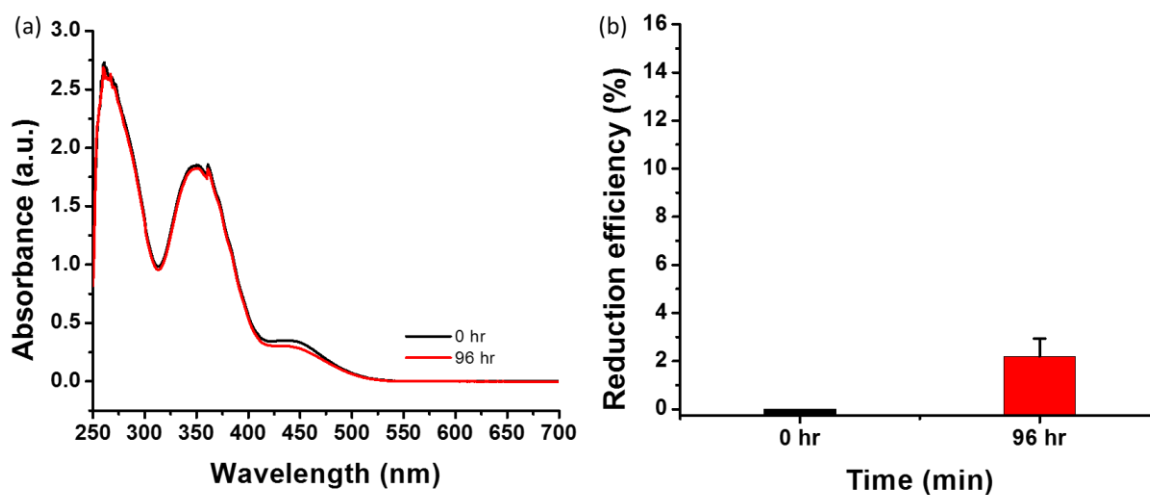

**Figure S4.** Role of leaf extract in the Cr (VI) reduction after 96 h of incubation: **(a)** absorbance spectra for Cr (VI) in the presence of leaf extract as a function of time; **(b)** reduction efficiency (%) versus time

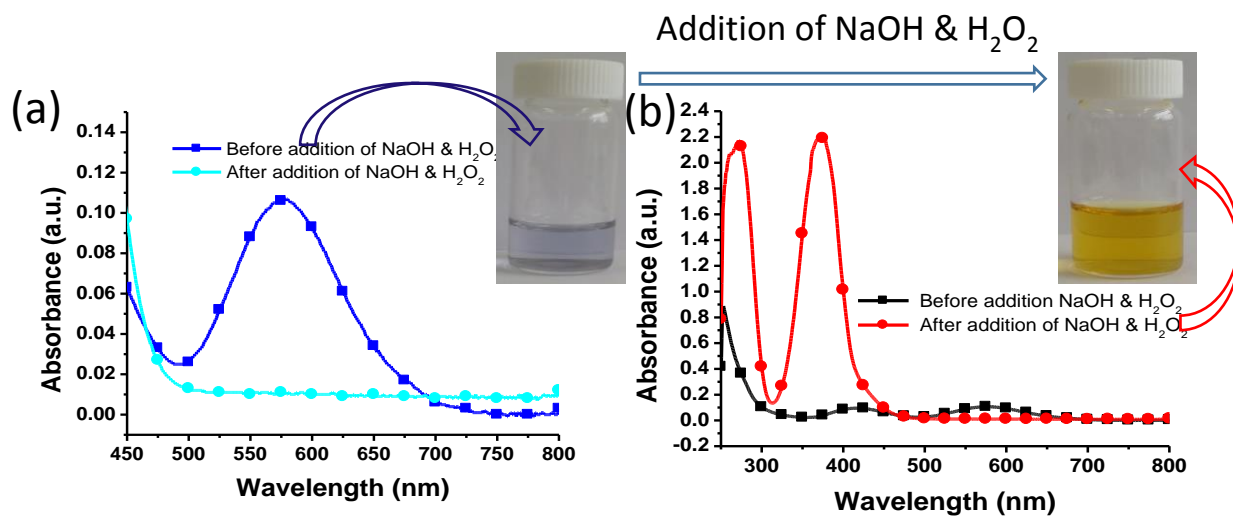

**Figure S5.** Detection of the catalytic conversion of Cr (VI): (a) UV-vis spectra of the catalytic product (inset shows the vial containing the catalytic product); (b) UV-vis spectra obtained after the addition of NaOH and H<sub>2</sub>O<sub>2</sub> (vial in the inset shows the colour change)

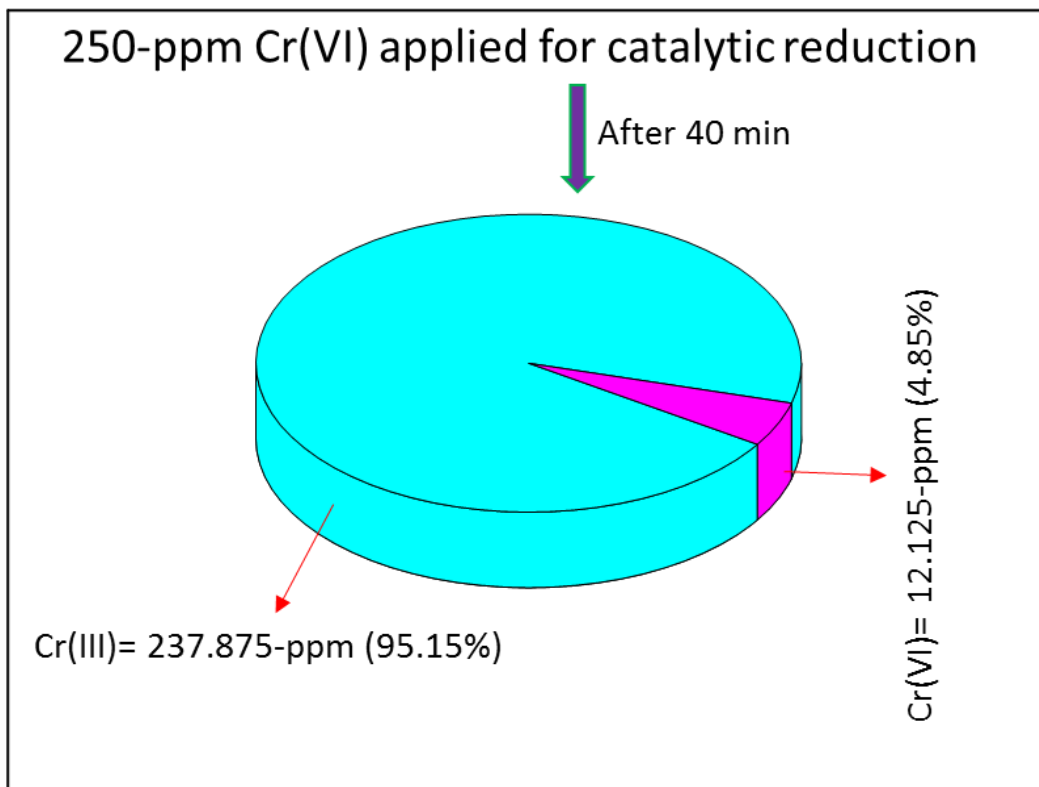

**Figure S6.** Representation of the catalytic reduction in the form of percentage of Cr species

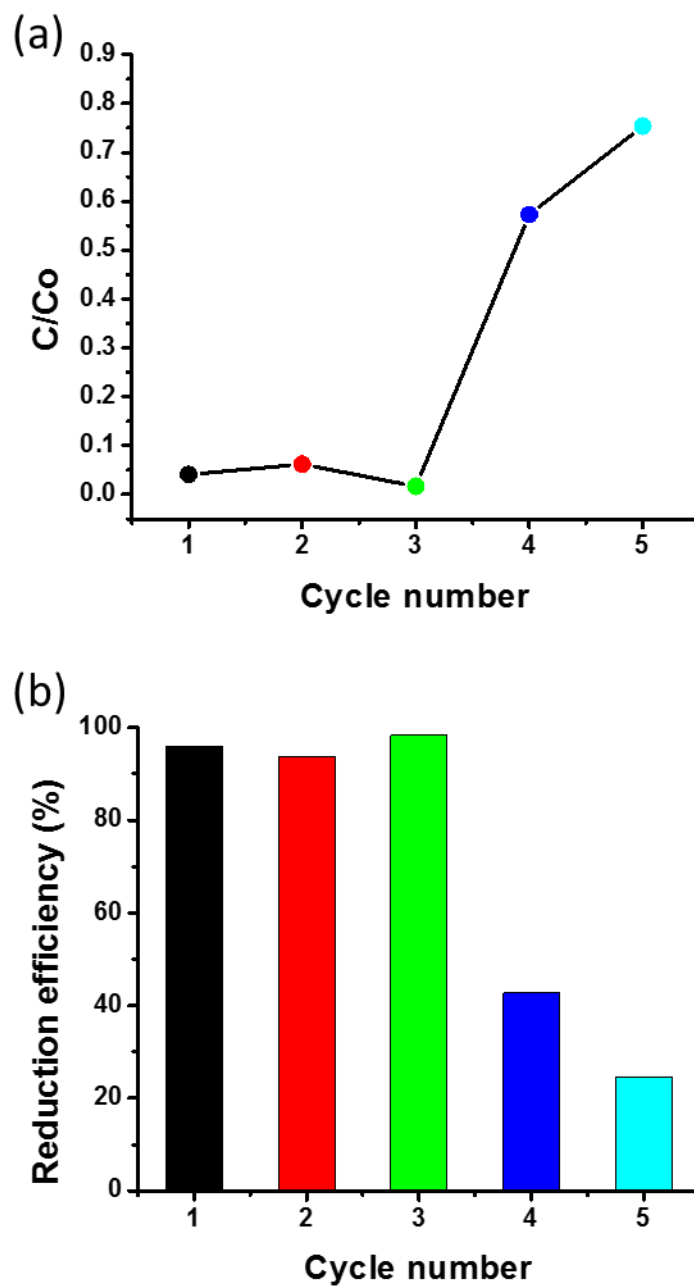

**Figure S7.** Reusability without recovery or purification, but with the addition of formic acid: (a) reduction kinetics represented by  $C/C_0$  versus the cycle number; (b) reduction efficiency (%) versus the cycle number

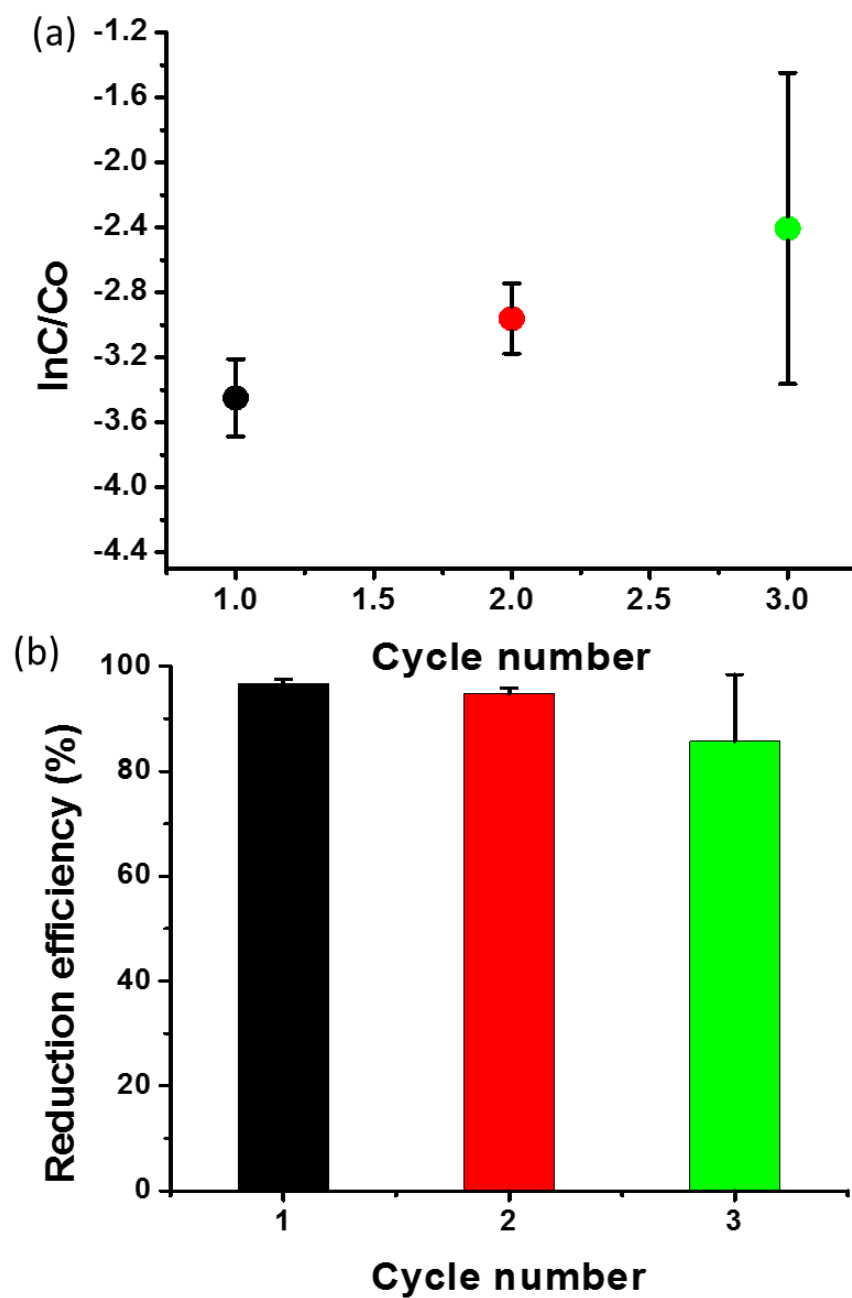

**Figure S8.** Reusability of the PdNPs after recovery or purification: (a) Reduction kinetics represented by  $\ln(C/C_0)$  versus the cycle number; (b) Reduction efficiency (%) versus the cycle number



| Element       | Line Type | k Factor | Absorption Correction | Wt%    | Wt% Sigma | Atomic % |
|---------------|-----------|----------|-----------------------|--------|-----------|----------|
| Cu            | K series  | 1.233    | 0.54                  | 14.23  | 0.43      | 21.75    |
| Pd            | L series  | 1.809    | 0.62                  | 85.77  | 0.43      | 78.25    |
| <b>Total:</b> |           |          |                       | 100.00 |           | 100.00   |

**Table S1.** Energy-dispersive X-ray analysis results indicating the elemental composition of the biosynthesised Pd nanoparticles (PdNPs)

| Label | Element Label   | Conc.          | %RSD  | Unadjusted Conc. | Intensity | %RSD |
|-------|-----------------|----------------|-------|------------------|-----------|------|
| Blank | Pd (340.458 nm) | 0.0026 (mg/kg) | 12.48 | 0.0026 (mg/kg)   | 29.9134   | 4.84 |
| Pd    | Pd (340.458 nm) | 0.2152 (mg/kg) | 1.16  | 0.2152 (mg/kg)   | 976.6761  | 1.14 |

**Table S2.** Pd concentration in 1 mL of aqueous solution (50  $\mu$ L of as-synthesised PdNPs + 950  $\mu$ L of deionised water)
